# Supplementary material for: Sensitivity of different BVOC emission schemes in WRF-Chem(v3.6) to vegetation distributions and its impacts over East China
Source: Copernicus journal article supplement (doi:10.5194/gmd-2021-29), 2021-03-01
Supplement: Supplementary file 1 [file gmd-2021-29-supplement.pdf]

**Supporting materials for “Sensitivity of different BVOC emission schemes in WRF-Chem to vegetation distributions and its impacts over East China”**

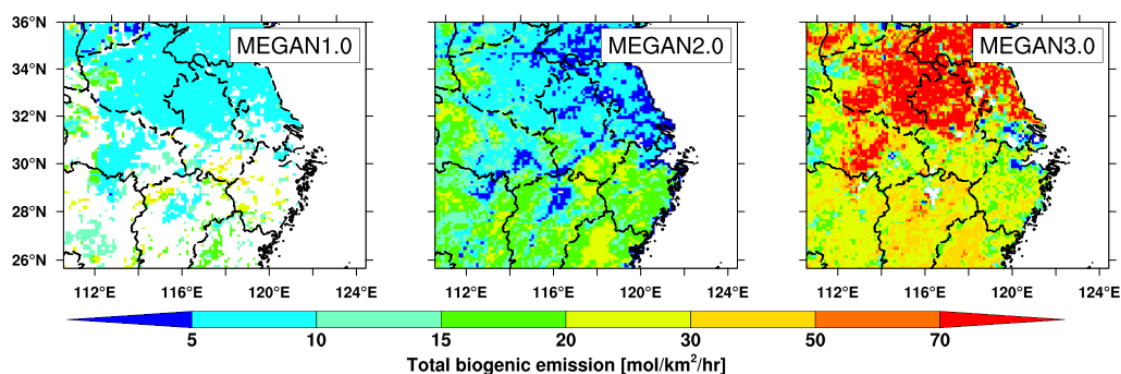

**Figure S1.** Spatial distribution of total biogenic emissions in July using the VEG-2015 vegetation date set.

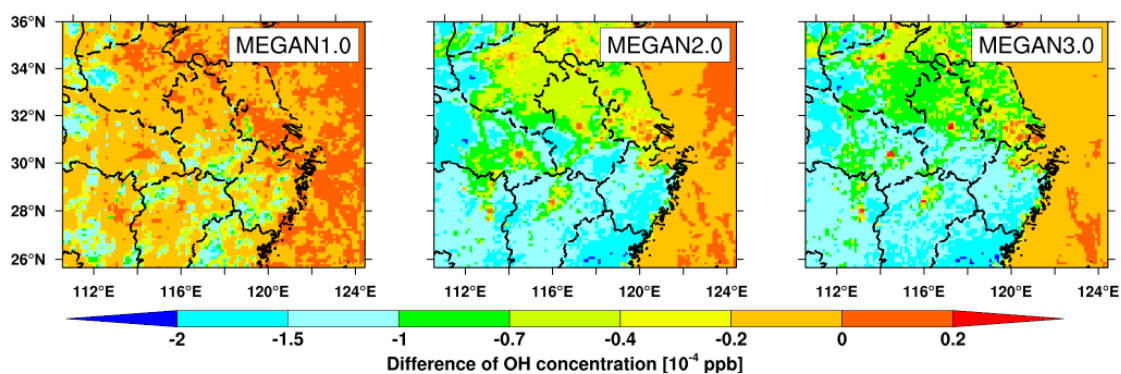

**Figure S2.** Spatial distribution of OH concentration due to the biogenic emissions near the surface in July using the VEG-2015 vegetation dataset.

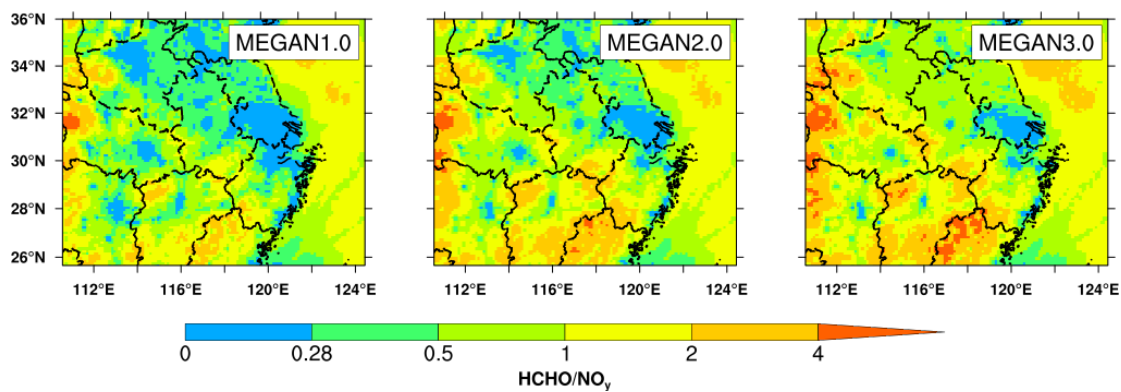

**Figure S3.** The ratio of monthly mean CH<sub>2</sub>O and NO<sub>y</sub> concentration for July 2015 over the simulation domain. The ozone production sensitivity can be roughly determined by the ratio of CH<sub>2</sub>O and NO<sub>y</sub>, where NO<sub>y</sub> represent for total reactive nitrogen. Ozone production is sensitive to NO<sub>x</sub> concentrations in NO<sub>x</sub> sensitive region if the ratio is large, otherwise, ozone production is more sensitive to VOCs concentrations.
